# Supplementary material for: Transcriptome analysis of common and diverged circulating miRNAs between arterial and venous during aging
Source: publisher site journal article supplement (doi:10.18632/aging.103385), 2020-06-30
Supplement: Supplementary file [file aging-v12i13-103385-supplementary-material-SD2.pdf]

## SUPPLEMENTARY TABLES

Supplementary Table 2. Aging-related deregulated miRNAs in arterial plasma.

| ID              | log <sub>2</sub> FC (Aged_A/Young_A) | P value    | FDR        |
|-----------------|--------------------------------------|------------|------------|
| rno-miR-136-3p  | 11.14                                | 1.95E-02   | 5.00E-02   |
| rno-miR-7a-2-3p | 3.24                                 | 2.41E-04   | 1.19E-03   |
| rno-miR-194-5p  | 3.05                                 | 8.54E-29   | 1.04E-27   |
| rno-miR-141-3p  | 2.89                                 | 9.35E-03   | 2.75E-02   |
| rno-miR-802-5p  | 2.43                                 | 1.11E-12   | 9.43E-12   |
| rno-miR-122-3p  | 2.38                                 | <1.00E-300 | <1.00E-300 |
| rno-miR-204-5p  | 2.37                                 | 8.18E-04   | 3.47E-03   |
| rno-miR-200a-3p | 2.16                                 | 3.49E-03   | 1.27E-02   |
| rno-miR-122-5p  | 2.09                                 | <1.00E-300 | <1.00E-300 |
| rno-let-7e-3p   | 1.88                                 | 3.81E-02   | 8.68E-02   |
| rno-miR-483-3p  | 1.77                                 | 1.74E-02   | 4.62E-02   |
| rno-miR-192-3p  | 1.16                                 | 4.30E-16   | 3.86E-15   |
| rno-miR-29b-3p  | 1.15                                 | 2.53E-24   | 2.86E-23   |
| rno-miR-192-5p  | 1.13                                 | 3.15E-146  | 1.37E-144  |
| rno-miR-26b-3p  | 1.12                                 | 4.26E-03   | 1.49E-02   |
| rno-miR-199a-5p | -1                                   | 2.89E-05   | 1.58E-04   |
| rno-miR-193b-5p | -1.01                                | 2.94E-02   | 7.07E-02   |
| rno-miR-27a-5p  | -1.03                                | 2.06E-02   | 5.24E-02   |
| rno-miR-324-5p  | -1.05                                | 1.26E-02   | 3.47E-02   |
| rno-miR-149-5p  | -1.08                                | 4.73E-14   | 4.12E-13   |
| rno-miR-199a-3p | -1.17                                | 6.25E-23   | 6.82E-22   |
| rno-miR-224-5p  | -1.19                                | 1.27E-04   | 6.56E-04   |
| rno-miR-107-3p  | -1.19                                | 8.67E-03   | 2.62E-02   |
| rno-miR-497-5p  | -1.24                                | 3.66E-03   | 1.31E-02   |
| rno-miR-382-5p  | -1.25                                | 8.94E-04   | 3.74E-03   |
| rno-miR-181a-5p | -1.31                                | 6.56E-23   | 6.91E-22   |
| rno-miR-99b-3p  | -1.31                                | 4.77E-03   | 1.62E-02   |
| rno-let-7d-5p   | -1.33                                | 1.94E-39   | 2.69E-38   |
| rno-miR-3074    | -1.42                                | 4.78E-02   | 1.03E-01   |
| rno-let-7i-3p   | -1.45                                | 3.88E-02   | 8.77E-02   |
| rno-miR-142-3p  | -1.45                                | 1.75E-06   | 1.05E-05   |
| rno-let-7i-5p   | -1.48                                | 5.79E-43   | 8.84E-42   |
| rno-miR-181b-5p | -1.51                                | 1.18E-08   | 9.24E-08   |
| rno-let-7c-1-3p | -1.53                                | 1.17E-02   | 3.37E-02   |
| rno-miR-140-5p  | -1.54                                | 6.72E-09   | 5.40E-08   |
| rno-miR-542-5p  | -1.57                                | 2.07E-08   | 1.58E-07   |
| rno-miR-342-5p  | -1.6                                 | 9.86E-03   | 2.87E-02   |
| rno-miR-450b-5p | -1.6                                 | 1.83E-02   | 4.76E-02   |
| rno-miR-17-5p   | -1.63                                | 2.87E-42   | 4.17E-41   |
| rno-miR-181c-5p | -1.65                                | 6.87E-03   | 2.16E-02   |
| rno-miR-7a-5p   | -1.72                                | 6.38E-03   | 2.05E-02   |
| rno-miR-455-3p  | -1.75                                | 1.69E-85   | 6.46E-84   |
| rno-miR-140-3p  | -1.79                                | <1.00E-300 | <1.00E-300 |

|                 |       |          |          |
|-----------------|-------|----------|----------|
| rno-miR-322-5p  | -1.8  | 2.36E-07 | 1.55E-06 |
| rno-miR-434-3p  | -1.83 | 3.05E-02 | 7.22E-02 |
| rno-miR-195-3p  | -1.86 | 5.94E-03 | 1.96E-02 |
| rno-miR-667-3p  | -1.86 | 2.71E-02 | 6.61E-02 |
| rno-miR-450a-5p | -1.91 | 4.98E-04 | 2.24E-03 |
| rno-miR-322-3p  | -1.98 | 6.83E-49 | 1.16E-47 |
| rno-miR-10b-3p  | -1.98 | 2.70E-02 | 6.61E-02 |
| rno-miR-652-3p  | -1.99 | 1.72E-02 | 4.59E-02 |
| rno-miR-181d-5p | -2.13 | 3.73E-02 | 8.55E-02 |
| rno-miR-503-5p  | -2.27 | 1.77E-03 | 6.93E-03 |
| rno-miR-296-5p  | -2.31 | 1.68E-02 | 4.53E-02 |
| rno-miR-144-3p  | -2.36 | 1.99E-03 | 7.69E-03 |
| rno-miR-20b-5p  | -2.38 | 7.56E-04 | 3.25E-03 |
| rno-miR-133b-3p | -2.47 | 1.51E-03 | 5.98E-03 |
| rno-miR-466c-5p | -2.57 | 1.88E-07 | 1.30E-06 |
| rno-miR-152-3p  | -2.68 | 3.30E-06 | 1.94E-05 |
| rno-miR-455-5p  | -2.86 | 7.70E-12 | 6.35E-11 |
| rno-miR-345-5p  | -3.29 | 2.07E-03 | 7.90E-03 |
| rno-miR-106b-5p | -3.43 | 3.51E-03 | 1.27E-02 |

The exact value for P-value (or FDR) smaller than 1.00E-300 could not be calculated, therefore it is shown as <1.00E-300 instead. FC: Fold Change; A: Artery.

**Supplementary Table 3. Arterial-versus-venous differentially-expressed miRNAs in the young group.**

| <b>ID</b>         | <b>log<sub>2</sub>FC (Young_A/Young_V)</b> | <b>P value</b> | <b>FDR</b> |
|-------------------|--------------------------------------------|----------------|------------|
| rno-miR-6324      | 4.03                                       | 4.95E-03       | 1.48E-02   |
| rno-miR-138-5p    | 3.9                                        | 3.64E-04       | 1.47E-03   |
| rno-miR-935       | 3.5                                        | 3.08E-02       | 7.48E-02   |
| rno-miR-125b-2-3p | 3.27                                       | 3.32E-02       | 7.91E-02   |
| rno-miR-132-3p    | 2.76                                       | 1.70E-04       | 7.18E-04   |
| rno-miR-450a-5p   | 2.25                                       | 2.76E-06       | 1.54E-05   |
| rno-miR-100-5p    | 2.19                                       | 8.61E-03       | 2.40E-02   |
| rno-miR-200b-3p   | 2.03                                       | 1.21E-05       | 6.18E-05   |
| rno-miR-466b-5p   | 1.94                                       | 3.10E-02       | 7.48E-02   |
| rno-miR-29c-5p    | 1.89                                       | 2.45E-02       | 6.14E-02   |
| rno-let-7i-3p     | 1.77                                       | 3.11E-02       | 7.48E-02   |
| rno-miR-145-5p    | 1.68                                       | <1.00E-300     | <1.00E-300 |
| rno-miR-20a-5p    | 1.67                                       | 1.41E-02       | 3.75E-02   |
| rno-miR-28-5p     | 1.66                                       | 5.44E-05       | 2.55E-04   |
| rno-miR-193a-5p   | 1.65                                       | 5.78E-09       | 4.07E-08   |
| rno-miR-466c-5p   | 1.51                                       | 1.14E-05       | 5.89E-05   |
| rno-miR-378b      | 1.45                                       | 1.14E-02       | 3.12E-02   |
| rno-miR-205       | 1.4                                        | 1.38E-05       | 6.89E-05   |
| rno-miR-31a-5p    | 1.39                                       | 7.65E-03       | 2.18E-02   |
| rno-miR-34a-5p    | 1.36                                       | 3.80E-02       | 8.78E-02   |
| rno-miR-122-3p    | 1.28                                       | 1.63E-35       | 3.02E-34   |
| rno-miR-29c-3p    | 1.28                                       | 1.26E-08       | 8.67E-08   |
| rno-miR-26a-5p    | 1.26                                       | 2.25E-03       | 7.48E-03   |
| rno-miR-222-3p    | 1.24                                       | 9.50E-04       | 3.47E-03   |
| rno-miR-125b-5p   | 1.21                                       | 1.95E-47       | 5.76E-46   |
| rno-miR-152-3p    | 1.2                                        | 3.40E-04       | 1.40E-03   |
| rno-miR-142-3p    | 1.18                                       | 2.31E-05       | 1.12E-04   |
| rno-miR-99a-5p    | 1.17                                       | 3.63E-02       | 8.52E-02   |
| rno-miR-143-3p    | 1.15                                       | 2.80E-47       | 7.53E-46   |
| rno-miR-192-3p    | 1.13                                       | 3.59E-03       | 1.10E-02   |
| rno-miR-1249      | 1.11                                       | 4.44E-03       | 1.34E-02   |
| rno-miR-375-3p    | 1.11                                       | 1.38E-03       | 4.87E-03   |
| rno-miR-450b-5p   | 1.08                                       | 1.69E-02       | 4.47E-02   |
| rno-miR-148a-3p   | 1.06                                       | 8.24E-03       | 2.32E-02   |
| rno-miR-30a-5p    | 1.02                                       | 2.79E-02       | 6.92E-02   |
| rno-miR-221-3p    | 1.01                                       | 2.27E-07       | 1.40E-06   |
| rno-miR-206-3p    | 1                                          | 4.24E-05       | 2.02E-04   |
| rno-miR-15b-3p    | -1.06                                      | 4.02E-29       | 5.66E-28   |
| rno-miR-26b-3p    | -1.07                                      | 3.78E-04       | 1.51E-03   |
| rno-miR-30e-3p    | -1.09                                      | 2.53E-25       | 2.87E-24   |
| rno-miR-503-3p    | -1.16                                      | 5.94E-22       | 6.51E-21   |

|                 |        |          |          |
|-----------------|--------|----------|----------|
| rno-miR-511-5p  | -1.18  | 4.09E-02 | 9.22E-02 |
| rno-miR-223-5p  | -1.27  | 1.01E-04 | 4.49E-04 |
| rno-miR-196a-5p | -1.39  | 3.16E-03 | 1.01E-02 |
| rno-miR-200a-3p | -1.59  | 5.59E-03 | 1.65E-02 |
| rno-miR-3559-5p | -1.73  | 1.00E-02 | 2.77E-02 |
| rno-miR-191a-3p | -1.89  | 1.93E-07 | 1.21E-06 |
| rno-miR-16-3p   | -1.89  | 1.44E-04 | 6.26E-04 |
| rno-miR-7a-2-3p | -1.9   | 4.25E-02 | 9.53E-02 |
| rno-miR-483-3p  | -2.1   | 3.98E-04 | 1.57E-03 |
| rno-miR-136-3p  | -10.61 | 4.05E-02 | 9.21E-02 |
| rno-miR-33-5p   | -10.67 | 3.61E-02 | 8.52E-02 |
| rno-miR-323-3p  | -11.47 | 4.57E-02 | 1.01E-01 |
| rno-miR-421-5p  | -11.84 | 1.56E-03 | 5.35E-03 |

The exact value for P-value (or FDR) smaller than 1.00E-300 could not be calculated, therefore is shown as <1.00E-300 instead. FC: Fold Change; A: Artery; V: Vein.

**Supplementary Table 4. Arterial-versus-venous differentially-expressed miRNAs in the aged group.**

| <b>ID</b>       | <b>log<sub>2</sub>FC (Aged_A/Aged_V)</b> | <b>P value</b> | <b>FDR</b> |
|-----------------|------------------------------------------|----------------|------------|
| rno-miR-675-3p  | 11.18                                    | 1.91E-03       | 1.25E-02   |
| rno-miR-18a-5p  | 3.82                                     | 2.33E-02       | 9.90E-02   |
| rno-miR-136-3p  | 3.29                                     | 5.03E-03       | 2.80E-02   |
| rno-miR-196a-5p | 3.18                                     | 9.97E-04       | 7.61E-03   |
| rno-miR-503-3p  | 2.74                                     | 4.96E-31       | 1.59E-29   |
| rno-miR-143-5p  | 2.63                                     | 1.90E-02       | 8.39E-02   |
| rno-miR-351-3p  | 2.55                                     | 8.22E-08       | 1.12E-06   |
| rno-let-7e-3p   | 2.54                                     | 2.24E-04       | 2.02E-03   |
| rno-miR-542-3p  | 2.52                                     | 2.20E-03       | 1.38E-02   |
| rno-miR-500-3p  | 2.38                                     | 4.77E-03       | 2.72E-02   |
| rno-miR-26a-3p  | 2.23                                     | 3.59E-02       | 1.33E-01   |
| rno-miR-450a-5p | 2.16                                     | 8.86E-04       | 7.00E-03   |
| rno-miR-455-3p  | 2.13                                     | 2.46E-54       | 1.11E-52   |
| rno-miR-369-5p  | 2.04                                     | 2.79E-02       | 1.11E-01   |
| rno-miR-351-5p  | 1.98                                     | 2.93E-36       | 1.10E-34   |
| rno-miR-224-5p  | 1.78                                     | 1.58E-03       | 1.09E-02   |
| rno-miR-149-5p  | 1.76                                     | 2.70E-21       | 6.77E-20   |
| rno-miR-450b-5p | 1.55                                     | 1.69E-03       | 1.14E-02   |
| rno-miR-542-5p  | 1.46                                     | 2.16E-03       | 1.37E-02   |
| rno-miR-140-5p  | 1.41                                     | 1.43E-08       | 2.30E-07   |
| rno-miR-322-3p  | 1.36                                     | 6.51E-15       | 1.22E-13   |
| rno-miR-18a-3p  | 1.36                                     | 4.23E-03       | 2.48E-02   |
| rno-miR-450b-3p | 1.33                                     | 2.72E-05       | 2.92E-04   |
| rno-miR-196b-5p | 1.29                                     | 1.79E-02       | 8.04E-02   |
| rno-miR-331-3p  | 1.25                                     | 1.10E-03       | 8.14E-03   |
| rno-miR-23b-5p  | 1.23                                     | 2.67E-02       | 1.07E-01   |
| rno-miR-140-3p  | 1.22                                     | 1.15E-88       | 1.30E-86   |
| rno-miR-872-5p  | 1.19                                     | 2.63E-02       | 1.07E-01   |
| rno-miR-615     | 1.15                                     | 3.01E-02       | 1.18E-01   |
| rno-miR-106b-3p | 1.01                                     | 1.21E-02       | 5.91E-02   |
| rno-miR-466c-5p | -1.01                                    | 1.05E-02       | 5.29E-02   |
| rno-miR-223-5p  | -1.09                                    | 9.86E-03       | 5.05E-02   |
| rno-miR-187-3p  | -1.1                                     | 6.65E-03       | 3.61E-02   |
| rno-miR-378b    | -1.12                                    | 1.82E-02       | 8.10E-02   |
| rno-miR-7a-5p   | -1.13                                    | 8.39E-03       | 4.45E-02   |
| rno-miR-652-3p  | -1.24                                    | 4.86E-02       | 1.71E-01   |
| rno-miR-144-3p  | -1.32                                    | 3.25E-02       | 1.23E-01   |
| rno-miR-133b-3p | -1.69                                    | 8.60E-03       | 4.50E-02   |
| rno-miR-1949    | -1.74                                    | 3.05E-02       | 1.18E-01   |
| rno-miR-328a-5p | -2.77                                    | 2.81E-02       | 1.11E-01   |
| rno-miR-31a-3p  | -4.28                                    | 4.51E-03       | 2.61E-02   |
| rno-miR-188-5p  | -10.8                                    | 9.19E-03       | 4.76E-02   |

FC: Fold Change; A: Artery; V: Vein.
